# Supplementary material for: Aquaculture as a source of empirical evidence for coevolution between CRISPR-Cas and phage
Source: Philos Trans R Soc Lond B Biol Sci. 2019 Mar 25;374(1772):20180100. doi: 10.1098/rstb.2018.0100 (PMC6452259; doi:10.1098/rstb.2018.0100)
Supplement: CRISPR-Cas in aquaculture pathogens [file rstb20180100supp1.xlsx]

## Sheet: Sheet1
Supplementary Table 1.
Aquaculture as a source of empirical evidence for coevolution between CRISPR-Cas and phage
Ville Hoikkala, Gabriel MF Almeida, Elina Laanto, Lotta-Riina Sundberg
Species	None	I-C	I-E	I-F	III-C	II-A	II-B	II-C	V-A	VI-B	Total loci	Strains analyzed	Type IV	Type V-U	Phage isolates
Aeromonas salmonicida*	6	0	0	0	0	0	0	0	0	0	6	6	6	0	Yes
Edwardsiella ictaluri	3	0	0	0	0	0	0	0	0	0	3	3	3	2	Yes
Edwardsiella piscicida -like species	1	0	1	0	0	0	0	0	0	0	2	2	1	0	Yes
Edwardsiella tarda	4	0	0	0	0	0	0	0	0	0	4	4	4	0	Yes
Flavobacterium branchiophilum	0	0	0	0	0	0	0	1	1	1	3	1	0	0	No
Flavobacterium columnare	0	0	0	0	0	0	0	5	0	5	10	5	0	0	Yes
Flavobacterium psychrophilum	5	0	0	0	0	0	0	3	0	0	8	8	0	0	Yes
Francisella noatunensis subsp. orientalis	7	0	0	0	0	0	0	0	0	0	7	7	0	0	No
Lactococcus garvieae	3	0	0	0	0	0	0	0	0	0	3	3	0	0	Yes
Moritella viscosa	0	0	0	1	0	0	0	0	0	0	1	1	1	0	No
Mycobacterium marinum	2	0	0	0	0	0	0	0	0	0	2	2	2	0	No
Neorickettsia helminthoeca	1	0	0	0	0	0	0	0	0	0	1	1	0	0	No
Photobacterium damselae subsp. piscicida	1	0	0	0	0	0	0	0	0	0	1	1	1	0	Yes
Piscirickettsia salmonis	19	0	0	0	0	0	0	0	0	0	19	19	0	0	No
Pseudomonas plecoglossicida	1	0	0	0	0	0	0	0	0	0	1	1	0	0	Yes
Renibacterium salmoninarum	1	0	0	0	0	0	0	0	0	0	1	1	1	0	No
Streptococcus agalactiae	2	15	0	0	0	47	17	0	0	0	81	49	0	0	Yes
Tenacibaculum maritimum	1	0	0	0	0	0	0	0	0	0	1	1	0	0	No
Vibrio alginolyticus	13	0	0	1	0	0	0	0	0	0	14	14	14	2	Yes
Vibrio anguillarum**	13	0	0	0	0	0	0	0	0	0	13	13	13	1	Yes
Vibrio harveyi	3	0	1	0	0	0	0	0	0	0	4	4	4	0	Yes
Vibrio parahaemolyticus	21	0	0	1	0	0	0	0	0	0	22	22	22	1	Yes
Vibrio vulnificus	13	0	0	1	1	0	0	0	0	0	15	15	15	0	Yes
Yersinia ruckeri	5	0	0	0	0	0	0	0	0	0	5	5	5	5	Yes
* Non-pathogenic subsp. pectinolytica was not analyzed, contains I-F)
** Partial genome contains CRISPR-Cas (Kalatzis, P., Rørbo, N., Castillo, D., Mauritzen, J., Jørgensen, J., Kokkari, C., Zhang, F., Katharios, P. & Middelboe, M. 2017 Stumbling across the Same Phage: Comparative Genomics of Widespread Temperate Phages Infecting the Fish Pathogen Vibrio anguillarum. Viruses 9, 122–19. (doi:10.3390/v9050122))
Species	Assembly	Number of CRISPRs	Total Cas Prots	Total non V-U Prots	Genes present	System type	System subtype	Multiple systems	cas1 missing	Missing signature prot	Missing RSAs
Aeromonas salmonicida	GCF_000196395	0	1	1	DinG	TypeIV	0	1	missing cas1	0	no repeats
Aeromonas salmonicida	GCF_002214245	0	1	1	DinG	TypeIV	0	1	missing cas1	0	no repeats
Aeromonas salmonicida	GCF_002214265	0	1	1	DinG	TypeIV	0	1	missing cas1	0	no repeats
Aeromonas salmonicida	GCF_002214305	0	3	3	DinG|cas6|cas7	TypeIV	0	1	missing cas1	0	no repeats
Aeromonas salmonicida	GCF_002313065	0	1	1	DinG	TypeIV	0	1	missing cas1	0	no repeats
Aeromonas salmonicida	GCF_002764135	0	1	1	DinG	TypeIV	0	1	missing cas1	0	no repeats
Edwardsiella ictaluri	GCF_000022885	0	6	2	DinG|c2c8|c2c9|cas1	TypeIV|TypeV-U	TypeVU-2|TypeVU-4	2	0	0	no repeats
Edwardsiella ictaluri	GCF_002076875	0	2	2	DinG|cas1	TypeIV	0	1	0	0	no repeats
Edwardsiella ictaluri	GCF_003054425	0	6	2	DinG|c2c8|c2c9|cas1	TypeIV|TypeV-U	TypeVU-2|TypeVU-4	2	0	0	no repeats
Edwardsiella piscidica -like species	GCF_001186215	2	10	10	DinG|Ref_set_from_Makarova_2015_cse2gr11_generated_2017-05-15.fasta|cas1|cas2|cas3|cas5|cas6|cas7|cas8e	TypeI|TypeIV	TypeI-E	2	0	0
Edwardsiella piscidica -like species	GCF_000800725	0	7	7	Ref_set_from_Makarova_2015_cse2gr11_generated_2017-05-15.fasta|cas1|cas2|cas5|cas6|cas7	0	0	0	0	missing signature protein
Edwardsiella tarda	GCF_000020865	0	2	2	DinG|cas1	TypeIV	0	1	0	0	no repeats
Edwardsiella tarda	GCF_000146305	0	2	2	DinG|cas1	TypeIV	0	1	0	0	no repeats
Edwardsiella tarda	GCF_001011055	0	2	2	DinG|cas1	TypeIV	0	1	0	0	no repeats
Edwardsiella tarda	GCF_002504285	0	2	2	DinG|cas1	TypeIV	0	1	0	0	no repeats
Flavobacterium branchiophilum	GCF_000253275	5	6	6	DEDDh|cas12a|cas13b|cas2|cas9	TypeII|TypeV|TypeVI	TypeII-C|TypeV-A|TypeVI-B	3	0	0	not all loci have cas genes
Flavobacterium columnare	GCF_000240075	3	5	5	DEDDh|cas1|cas13b|cas9	TypeII|TypeVI	TypeII-C|TypeVI-B	2	0	0	not all loci have cas genes
Flavobacterium columnare	GCF_001534645	3	6	6	DEDDh|cas1|cas13b|cas2|cas9	TypeII|TypeVI	TypeII-C|TypeVI-B	2	0	0	not all loci have cas genes
Flavobacterium columnare	GCF_001641185	2	5	5	DEDDh|cas1|cas13b|cas2|cas9	TypeII|TypeVI	TypeII-C|TypeVI-B	2	0	0
Flavobacterium columnare	GCF_001677395	2	5	5	DEDDh|cas1|cas13b|cas2|cas9	TypeII|TypeVI	TypeII-C|TypeVI-B	2	0	0
Flavobacterium columnare	GCF_001936395	2	5	5	DEDDh|cas1|cas13b|cas2|cas9	TypeII|TypeVI	TypeII-C|TypeVI-B	2	0	0
Flavobacterium psychrophilum	GCF_000064305	2	4	4	DEDDh|cas1|cas2|cas9	TypeII	TypeII-C	1	0	0	not all loci have cas genes
Flavobacterium psychrophilum	GCF_000739395	2	4	4	DEDDh|cas1|cas2|cas9	TypeII	TypeII-C	1	0	0	not all loci have cas genes
Flavobacterium psychrophilum	GCF_000754365	2	4	4	DEDDh|cas1|cas2|cas9	TypeII	TypeII-C	1	0	0	not all loci have cas genes
Flavobacterium psychrophilum	GCF_000767095	1	3	3	DEDDh|cas1|cas2	0	0	0	0	missing signature protein
Flavobacterium psychrophilum	GCF_000831185	1	3	3	DEDDh|cas1|cas2	0	0	0	0	missing signature protein
Flavobacterium psychrophilum	GCF_000831205	1	3	3	DEDDh|cas1|cas2	0	0	0	0	missing signature protein
Flavobacterium psychrophilum	GCF_000831225	1	3	3	DEDDh|cas1|cas2	0	0	0	0	missing signature protein
Flavobacterium psychrophilum	GCF_000754405	0	1	1	DEDDh	0	0	0	missing cas1	missing signature protein
Francisella noatuensis subsp. orientalis	GCF_000262205	0	0	0	0	0	0	0	0	0
Francisella noatuensis subsp. orientalis	GCF_000505725	0	0	0	0	0	0	0	0	0
Francisella noatuensis subsp. orientalis	GCF_001042525	0	0	0	0	0	0	0	0	0
Francisella noatuensis subsp. orientalis	GCF_001042545	0	0	0	0	0	0	0	0	0
Francisella noatuensis subsp. orientalis	GCF_001042565	0	0	0	0	0	0	0	0	0
Francisella noatuensis subsp. orientalis	GCF_001190905	0	0	0	0	0	0	0	0	0
Francisella noatuensis subsp. orientalis	GCF_001885275	0	0	0	0	0	0	0	0	0
Lactococcus garvieae	GCF_000269925	0	0	0	0	0	0	0	0	0
Lactococcus garvieae	GCF_000269945	0	0	0	0	0	0	0	0	0
Lactococcus garvieae	GCF_002355575	0	0	0	0	0	0	0	0	0
Moritella viscosa	GCF_000953735	1	8	8	DinG|cas1|cas3|cas5|cas6|cas7|cas8f	TypeI|TypeIV	TypeI-F	2	0	0	not all loci have repeats
Mycobacterium marinum	GCF_000018345	0	2	2	DEDDh|DinG	TypeIV	0	1	missing cas1	0	no repeats
Mycobacterium marinum	GCF_000723425	0	2	2	DEDDh|DinG	TypeIV	0	1	missing cas1	0	no repeats
Neorickettsia helminthoeca	GCF_000632985	0	0	0	0	0	0	0	0	0
Photobacterium damselae subsp. piscicida	GCF_002356235	0	2	2	DinG|cas1	TypeIV	0	1	0	0	no repeats
Piscirickettsia salmonis	GCF_001932595	1	0	0	0	0	0	0	0	0
Piscirickettsia salmonis	GCF_001932735	1	0	0	0	0	0	0	0	0
Piscirickettsia salmonis	GCF_001932755	1	0	0	0	0	0	0	0	0
Piscirickettsia salmonis	GCF_001932775	1	0	0	0	0	0	0	0	0
Piscirickettsia salmonis	GCF_001932795	1	0	0	0	0	0	0	0	0
Piscirickettsia salmonis	GCF_000300295	0	0	0	0	0	0	0	0	0
Piscirickettsia salmonis	GCF_000756415	0	0	0	0	0	0	0	0	0
Piscirickettsia salmonis	GCF_000756435	0	0	0	0	0	0	0	0	0
Piscirickettsia salmonis	GCF_001514395	0	0	0	0	0	0	0	0	0
Piscirickettsia salmonis	GCF_001534725	0	0	0	0	0	0	0	0	0
Piscirickettsia salmonis	GCF_001746795	0	0	0	0	0	0	0	0	0
Piscirickettsia salmonis	GCF_001932815	0	0	0	0	0	0	0	0	0
Piscirickettsia salmonis	GCF_001932835	0	0	0	0	0	0	0	0	0
Piscirickettsia salmonis	GCF_001932855	0	0	0	0	0	0	0	0	0
Piscirickettsia salmonis	GCF_001932875	0	0	0	0	0	0	0	0	0
Piscirickettsia salmonis	GCF_001932895	0	0	0	0	0	0	0	0	0
Piscirickettsia salmonis	GCF_001932915	0	0	0	0	0	0	0	0	0
Piscirickettsia salmonis	GCF_001932935	0	0	0	0	0	0	0	0	0
Piscirickettsia salmonis	GCF_001932955	0	0	0	0	0	0	0	0	0
Pseudomonas plecoglossicida	GCF_000831585	0	0	0	0	0	0	0	0	0
Renibacterium salmoninarum	GCF_000018885	0	1	1	DinG	TypeIV	0	1	missing cas1	0	no repeats
Streptococcus agalactiae	GCF_000007265	1	5	5	cas1|cas2|cas9|csm6|csn2	TypeII	TypeII-A	1	0	0
Streptococcus agalactiae	GCF_000012705	1	4	4	cas1|cas2|cas9|csn2	TypeII	TypeII-A	1	0	0
Streptococcus agalactiae	GCF_000196055	1	5	5	cas1|cas2|cas9|csm6|csn2	TypeII	TypeII-A	1	0	0
Streptococcus agalactiae	GCF_000299135	1	5	5	cas1|cas2|cas9|csm6|csn2	TypeII	TypeII-A	1	0	0
Streptococcus agalactiae	GCF_000427035	1	5	5	cas1|cas2|cas9|csm6|csn2	TypeII	TypeII-A	1	0	0
Streptococcus agalactiae	GCF_000427075	2	10	10	cas1|cas2|cas4|cas5|cas7|cas8c|csm6|csn2	0	0	0	0	missing signature protein
Streptococcus agalactiae	GCF_000689235	1	6	6	cas1|cas2|cas3|cas9|csm6|csn2	TypeI|TypeII	TypeII-A	2	0	0	not all loci have repeats
Streptococcus agalactiae	GCF_000730215	1	5	5	cas1|cas2|cas9|csm6|csn2	TypeII	TypeII-A	1	0	0
Streptococcus agalactiae	GCF_000730255	2	11	11	cas1|cas2|cas3|cas4|cas5|cas7|cas8c|cas9|csm6|csn2	TypeI|TypeII	TypeI-C|TypeII-A|TypeII-B	2	0	0
Streptococcus agalactiae	GCF_000782855	1	5	5	cas1|cas2|cas9|csm6|csn2	TypeII	TypeII-A	1	0	0
Streptococcus agalactiae	GCF_000831105	1	5	5	cas1|cas2|cas9|csm6|csn2	TypeII	TypeII-A	1	0	0
Streptococcus agalactiae	GCF_000831125	1	5	5	cas1|cas2|cas9|csm6|csn2	TypeII	TypeII-A	1	0	0
Streptococcus agalactiae	GCF_000831145	1	5	5	cas1|cas2|cas9|csm6|csn2	TypeII	TypeII-A	1	0	0
Streptococcus agalactiae	GCF_001026925	1	5	5	cas1|cas2|cas9|csm6|csn2	TypeII	TypeII-A	1	0	0
Streptococcus agalactiae	GCF_001190805	1	5	5	cas1|cas2|cas9|csm6|csn2	TypeII	TypeII-A	1	0	0
Streptococcus agalactiae	GCF_001190885	1	5	5	cas1|cas2|cas9|csm6|csn2	TypeII	TypeII-A	1	0	0
Streptococcus agalactiae	GCF_001266635	1	5	5	cas1|cas2|cas9|csm6|csn2	TypeII	TypeII-A	1	0	0
Streptococcus agalactiae	GCF_001275545	2	12	12	cas1|cas2|cas3|cas4|cas5|cas7|cas8c|cas9|csm6|csn2	TypeI|TypeII	TypeI-C|TypeII-A|TypeII-B	2	0	0
Streptococcus agalactiae	GCF_001448985	2	5	5	cas1|cas2|cas9|csm6|csn2	TypeII	TypeII-A	1	0	0	not all loci have cas genes
Streptococcus agalactiae	GCF_001552035	1	6	6	cas1|cas2|cas3|cas9|csm6|csn2	TypeI|TypeII	TypeII-A	2	0	0	not all loci have repeats
Streptococcus agalactiae	GCF_001592385	2	12	12	cas1|cas2|cas3|cas4|cas5|cas7|cas8c|cas9|csm6|csn2	TypeI|TypeII	TypeI-C|TypeII-A|TypeII-B	2	0	0
Streptococcus agalactiae	GCF_001592425	2	12	12	cas1|cas2|cas3|cas4|cas5|cas7|cas8c|cas9|csm6|csn2	TypeI|TypeII	TypeI-C|TypeII-A|TypeII-B	2	0	0
Streptococcus agalactiae	GCF_001683515	2	12	12	cas1|cas2|cas3|cas4|cas5|cas7|cas8c|cas9|csm6|csn2	TypeI|TypeII	TypeI-C|TypeII-A|TypeII-B	2	0	0
Streptococcus agalactiae	GCF_001712835	1	5	5	cas1|cas2|cas9|csm6|csn2	TypeII	TypeII-A	1	0	0
Streptococcus agalactiae	GCF_001729925	1	5	5	cas1|cas2|cas9|csm6|csn2	TypeII	TypeII-A	1	0	0
Streptococcus agalactiae	GCF_001932715	1	5	5	cas1|cas2|cas9|csm6|csn2	TypeII	TypeII-A	1	0	0
Streptococcus agalactiae	GCF_002025005	1	5	5	cas1|cas2|cas9|csm6|csn2	TypeII	TypeII-A	1	0	0
Streptococcus agalactiae	GCF_002025025	2	12	12	cas1|cas2|cas3|cas4|cas5|cas7|cas8c|cas9|csm6|csn2	TypeI|TypeII	TypeI-C|TypeII-A|TypeII-B	2	0	0
Streptococcus agalactiae	GCF_002073695	2	5	5	cas1|cas2|cas9|csm6|csn2	TypeII	TypeII-A	1	0	0	not all loci have cas genes
Streptococcus agalactiae	GCF_002197205	2	11	11	cas1|cas2|cas3|cas4|cas5|cas7|cas9|csm6|csn2	TypeI|TypeII	TypeII-A|TypeII-B	2	0	0
Streptococcus agalactiae	GCF_002197245	2	12	12	cas1|cas2|cas3|cas4|cas5|cas7|cas8c|cas9|csm6|csn2	TypeI|TypeII	TypeI-C|TypeII-A|TypeII-B	2	0	0
Streptococcus agalactiae	GCF_002197265	2	12	12	cas1|cas2|cas3|cas4|cas5|cas7|cas8c|cas9|csm6|csn2	TypeI|TypeII	TypeI-C|TypeII-A|TypeII-B	2	0	0
Streptococcus agalactiae	GCF_002197285	2	12	12	cas1|cas2|cas3|cas4|cas5|cas7|cas8c|cas9|csm6|csn2	TypeI|TypeII	TypeI-C|TypeII-A|TypeII-B	2	0	0
Streptococcus agalactiae	GCF_002197305	1	5	5	cas1|cas2|cas9|csm6|csn2	TypeII	TypeII-A	1	0	0
Streptococcus agalactiae	GCF_002197325	3	5	5	cas1|cas2|cas9|csm6|csn2	TypeII	TypeII-A	1	0	0	not all loci have cas genes
Streptococcus agalactiae	GCF_002197365	1	6	6	cas1|cas2|cas3|cas9|csm6|csn2	TypeI|TypeII	TypeII-A	2	0	0	not all loci have repeats
Streptococcus agalactiae	GCF_002197385	1	5	5	cas1|cas2|cas9|csm6|csn2	TypeII	TypeII-A	1	0	0
Streptococcus agalactiae	GCF_002197425	2	12	12	cas1|cas2|cas3|cas4|cas5|cas7|cas8c|cas9|csm6|csn2	TypeI|TypeII	TypeI-C|TypeII-A|TypeII-B	2	0	0
Streptococcus agalactiae	GCF_002214425	1	5	5	cas1|cas2|cas9|csm6|csn2	TypeII	TypeII-A	1	0	0
Streptococcus agalactiae	GCF_002289205	1	6	6	cas1|cas2|cas3|cas9|csm6|csn2	TypeI|TypeII	TypeII-A	2	0	0	not all loci have repeats
Streptococcus agalactiae	GCF_002812425	2	12	12	cas1|cas2|cas3|cas4|cas5|cas7|cas8c|cas9|csm6|csn2	TypeI|TypeII	TypeI-C|TypeII-A|TypeII-B	2	0	0
Streptococcus agalactiae	GCF_002812445	2	12	12	cas1|cas2|cas3|cas4|cas5|cas7|cas8c|cas9|csm6|csn2	TypeI|TypeII	TypeI-C|TypeII-A|TypeII-B	2	0	0
Streptococcus agalactiae	GCF_002812465	2	12	12	cas1|cas2|cas3|cas4|cas5|cas7|cas8c|cas9|csm6|csn2	TypeI|TypeII	TypeI-C|TypeII-A|TypeII-B	2	0	0
Streptococcus agalactiae	GCF_002812505	2	12	12	cas1|cas2|cas3|cas4|cas5|cas7|cas8c|cas9|csm6|csn2	TypeI|TypeII	TypeI-C|TypeII-A|TypeII-B	2	0	0
Streptococcus agalactiae	GCF_900078265	1	6	6	cas1|cas2|cas3|cas9|csm6|csn2	TypeI|TypeII	TypeII-A	2	0	0	not all loci have repeats
Streptococcus agalactiae	GCF_900155855	1	6	6	cas1|cas2|cas3|cas9|csm6|csn2	TypeI|TypeII	TypeII-A	2	0	0	not all loci have repeats
Streptococcus agalactiae	GCF_900474905	2	12	12	cas1|cas2|cas3|cas4|cas5|cas7|cas8c|cas9|csm6|csn2	TypeI|TypeII	TypeI-C|TypeII-A|TypeII-B	2	0	0
Streptococcus agalactiae	GCF_900475355	1	5	5	cas1|cas2|cas9|csm6|csn2	TypeII	TypeII-A	1	0	0
Streptococcus agalactiae	GCF_002881315	0	9	9	cas1|cas2|cas3|cas4|cas5|cas7|cas9|csm6	TypeI|TypeII	TypeII-B	2	0	0	no repeats
Tenacibaculum maritimum	GCF_900119795	1	2	2	cas1|cas2	0	0	0	0	missing signature protein
Vibrio alginolyticus	GCF_001469735	1	9	8	DinG|c2c9|cas1|cas3|cas5|cas6|cas7|cas8f	TypeI|TypeIV|TypeV-U	TypeI-F|TypeVU-4	3	0	0	not all loci have repeats
Vibrio alginolyticus	GCF_000354175	0	3	3	DEDDh|DinG|cas1	TypeIV	0	1	0	0	no repeats
Vibrio alginolyticus	GCF_001679745	0	4	2	DinG|c2c9|cas1	TypeIV|TypeV-U	TypeVU-4	2	0	0	no repeats
Vibrio alginolyticus	GCF_002119505	0	2	2	DinG|cas1	TypeIV	0	1	0	0	no repeats
Vibrio alginolyticus	GCF_002119525	0	2	2	DinG|cas1	TypeIV	0	1	0	0	no repeats
Vibrio alginolyticus	GCF_002119545	0	2	2	DinG|cas1	TypeIV	0	1	0	0	no repeats
Vibrio alginolyticus	GCF_002119565	0	2	2	DinG|cas1	TypeIV	0	1	0	0	no repeats
Vibrio alginolyticus	GCF_002119585	0	2	2	DinG|cas1	TypeIV	0	1	0	0	no repeats
Vibrio alginolyticus	GCF_002149065	0	2	2	DinG|cas1	TypeIV	0	1	0	0	no repeats
Vibrio alginolyticus	GCF_002149085	0	2	2	DinG|cas1	TypeIV	0	1	0	0	no repeats
Vibrio alginolyticus	GCF_002149105	0	2	2	DinG|cas1	TypeIV	0	1	0	0	no repeats
Vibrio alginolyticus	GCF_002953515	0	3	3	DEDDh|DinG|cas1	TypeIV	0	1	0	0	no repeats
Vibrio alginolyticus	GCF_002953535	0	2	2	DinG|cas1	TypeIV	0	1	0	0	no repeats
Vibrio alginolyticus	GCF_002953975	0	3	3	DEDDh|DinG|cas1	TypeIV	0	1	0	0	no repeats
Vibrio anguillarum	GCF_000217675	0	2	2	DinG|cas1	TypeIV	0	1	0	0	no repeats
Vibrio anguillarum	GCF_000462975	0	2	2	DinG|cas1	TypeIV	0	1	0	0	no repeats
Vibrio anguillarum	GCF_000786425	0	2	2	DinG|cas1	TypeIV	0	1	0	0	no repeats
Vibrio anguillarum	GCF_001660505	0	8	8	DinG|cas1|cas5|cas6|cas7|cas8f	TypeIV	0	1	0	0	no repeats
Vibrio anguillarum	GCF_002163795	0	1	1	DinG	TypeIV	0	1	missing cas1	0	no repeats
Vibrio anguillarum	GCF_002211505	0	2	2	DinG|cas1	TypeIV	0	1	0	0	no repeats
Vibrio anguillarum	GCF_002211985	0	5	5	DinG|cas1|cas5|cas6|cas7	TypeIV	0	1	0	0	no repeats
Vibrio anguillarum	GCF_002212005	0	5	5	DinG|cas1|cas5|cas6|cas7	TypeIV	0	1	0	0	no repeats
Vibrio anguillarum	GCF_002212025	0	2	2	DinG|cas1	TypeIV	0	1	0	0	no repeats
Vibrio anguillarum	GCF_002287545	0	5	5	DinG|cas1|cas5|cas6|cas7	TypeIV	0	1	0	0	no repeats
Vibrio anguillarum	GCF_002291265	0	2	2	DinG|cas1	TypeIV	0	1	0	0	no repeats
Vibrio anguillarum	GCF_002310335	0	6	5	DinG|c2c9|cas1|cas5|cas6|cas7	TypeIV|TypeV-U	TypeVU-4	2	0	0	no repeats
Vibrio anguillarum	GCF_003031205	0	2	2	DinG|cas1	TypeIV	0	1	0	0	no repeats
Vibrio harveyi	GCF_001558435	1	12	12	DEDDh|DinG|Ref_set_from_Makarova_2015_cse2gr11_generated_2017-05-15.fasta|cas1|cas2|cas3|cas5|cas6|cas7|cas8e|csx1	TypeI|TypeIV	TypeI-E	2	0	0	not all loci have repeats
Vibrio harveyi	GCF_000770115	0	3	3	DEDDh|DinG|cas1	TypeIV	0	1	0	0	no repeats
Vibrio harveyi	GCF_001908435	0	3	3	DEDDh|DinG|cas1	TypeIV	0	1	0	0	no repeats
Vibrio harveyi	GCF_002850295	0	3	3	DEDDh|DinG|cas1	TypeIV	0	1	0	0	no repeats
Vibrio parahaemolyticus	GCF_001879585	1	8	8	DinG|cas1|cas3|cas5|cas6|cas7|cas8f	TypeI|TypeIV	TypeI-F	2	0	0	not all loci have repeats
Vibrio parahaemolyticus	GCF_000196095	0	5	5	DinG|cas1|cas5|cas6|cas7	TypeIV	0	1	0	0	no repeats
Vibrio parahaemolyticus	GCF_000328405	0	6	6	DEDDh|DinG|cas1|cas5|cas6|cas7	TypeIV	0	1	0	0	no repeats
Vibrio parahaemolyticus	GCF_000430405	0	5	5	DinG|cas1|cas5|cas6|cas7	TypeIV	0	1	0	0	no repeats
Vibrio parahaemolyticus	GCF_000430425	0	2	2	DinG|cas1	TypeIV	0	1	0	0	no repeats
Vibrio parahaemolyticus	GCF_000568495	0	5	5	DinG|cas1|cas6|cas7|cas8f	TypeIV	0	1	0	0	no repeats
Vibrio parahaemolyticus	GCF_001188185	0	5	5	DinG|cas1|cas5|cas6|cas7	TypeIV	0	1	0	0	no repeats
Vibrio parahaemolyticus	GCF_001244315	0	2	2	DinG|cas1	TypeIV	0	1	0	0	no repeats
Vibrio parahaemolyticus	GCF_001304775	0	2	2	DinG|cas1	TypeIV	0	1	0	0	no repeats
Vibrio parahaemolyticus	GCF_001433415	0	2	2	DinG|cas1	TypeIV	0	1	0	0	no repeats
Vibrio parahaemolyticus	GCF_001558495	0	2	2	DinG|cas1	TypeIV	0	1	0	0	no repeats
Vibrio parahaemolyticus	GCF_001636035	0	4	2	DinG|c2c8|c2c9|cas1	TypeIV|TypeV-U	TypeVU-2|TypeVU-4	2	0	0	no repeats
Vibrio parahaemolyticus	GCF_001682175	0	8	8	DinG|cas1|cas5|cas6|cas7|cas8f	TypeIV	0	1	0	0	no repeats
Vibrio parahaemolyticus	GCF_001700835	0	2	2	DinG|cas1	TypeIV	0	1	0	0	no repeats
Vibrio parahaemolyticus	GCF_001758605	0	2	2	DinG|cas1	TypeIV	0	1	0	0	no repeats
Vibrio parahaemolyticus	GCF_001887055	0	2	2	DinG|cas1	TypeIV	0	1	0	0	no repeats
Vibrio parahaemolyticus	GCF_002073775	0	5	5	DinG|cas1|cas5|cas6|cas7	TypeIV	0	1	0	0	no repeats
Vibrio parahaemolyticus	GCF_002209725	0	8	8	DinG|cas1|cas5|cas6|cas7|cas8f	TypeIV	0	1	0	0	no repeats
Vibrio parahaemolyticus	GCF_002220985	0	5	5	DinG|cas1|cas6|cas7|cas8f	TypeIV	0	1	0	0	no repeats
Vibrio parahaemolyticus	GCF_003076895	0	2	2	DinG|cas1	TypeIV	0	1	0	0	no repeats
Vibrio parahaemolyticus	GCF_003085735	0	2	2	DinG|cas1	TypeIV	0	1	0	0	no repeats
Vibrio parahaemolyticus	GCF_003119375	0	2	2	DinG|cas1	TypeIV	0	1	0	0	no repeats
Vibrio vulnificus	GCF_000009745	2	14	14	DinG|cas1|cas10|cas2|cas6|csm3|csx1|csx10|csx16	TypeIII|TypeIV	TypeIII-C	2	0	0
Vibrio vulnificus	GCF_000746665	1	8	8	DinG|cas1|cas3|cas5|cas6|cas7|cas8f	TypeI|TypeIV	TypeI-F	2	0	0	not all loci have repeats
Vibrio vulnificus	GCF_002117205	1	2	2	DinG|cas1	TypeIV	0	1	0	0
Vibrio vulnificus	GCF_000039765	0	2	2	DinG|cas1	TypeIV	0	1	0	0	no repeats
Vibrio vulnificus	GCF_000186585	0	2	2	DinG|cas1	TypeIV	0	1	0	0	no repeats
Vibrio vulnificus	GCF_001433435	0	2	2	DinG|cas1	TypeIV	0	1	0	0	no repeats
Vibrio vulnificus	GCF_001558515	0	2	2	DinG|cas1	TypeIV	0	1	0	0	no repeats
Vibrio vulnificus	GCF_001653775	0	2	2	DinG|cas1	TypeIV	0	1	0	0	no repeats
Vibrio vulnificus	GCF_001675245	0	2	2	DinG|cas1	TypeIV	0	1	0	0	no repeats
Vibrio vulnificus	GCF_002204915	0	2	2	DinG|cas1	TypeIV	0	1	0	0	no repeats
Vibrio vulnificus	GCF_002215135	0	2	2	DinG|cas1	TypeIV	0	1	0	0	no repeats
Vibrio vulnificus	GCF_002224265	0	3	3	DinG|cas1|cas8f	TypeIV	0	1	0	0	no repeats
Vibrio vulnificus	GCF_002850455	0	2	2	DinG|cas1	TypeIV	0	1	0	0	no repeats
Vibrio vulnificus	GCF_002863725	0	2	2	DinG|cas1	TypeIV	0	1	0	0	no repeats
Vibrio vulnificus	GCF_003047125	0	2	2	DinG|cas1	TypeIV	0	1	0	0	no repeats
Yersinia ruckeri	GCF_000775355	0	4	2	DinG|c2c8|c2c9|cas1	TypeIV|TypeV-U	TypeVU-2|TypeVU-4	2	0	0	no repeats
Yersinia ruckeri	GCF_000834255	0	7	2	DinG|c2c8|c2c9|cas1	TypeIV|TypeV-U	TypeVU-2|TypeVU-4	2	0	0	no repeats
Yersinia ruckeri	GCF_000964565	0	4	2	DinG|c2c8|c2c9|cas1	TypeIV|TypeV-U	TypeVU-2|TypeVU-4	2	0	0	no repeats
Yersinia ruckeri	GCF_002192595	0	6	2	DinG|c2c8|c2c9|cas1	TypeIV|TypeV-U	TypeVU-2|TypeVU-4	2	0	0	no repeats
Yersinia ruckeri	GCF_002442495	0	4	2	DinG|c2c8|c2c9|cas1	TypeIV|TypeV-U	TypeVU-2|TypeVU-4	2	0	0	no repeats
